# Supplementary material for: Assessing population changes of historically overexploited black corals (Order: Antipatharia) in Cozumel, Mexico
Source: PeerJ. 2018 Jul 4;6:e5129. doi: 10.7717/peerj.5129 (PMC6035717; doi:10.7717/peerj.5129)
Supplement: Data S2 — Column headings are as follows: Year (the year of survey; all 1998 and 1999 are labeled 1998), Survey.Year_Month (the year_month that the survey was conducted), Site (the Cozumel site name where surveys were conducted), Transect (the replicate transect number of the survey), Transect.Area. m2 (the survey area that the transect covered in m2), Height.cm (the black coral colony maximum height in cm), Width.cm (the black coral colony maximum width in cm), Diameter.cm (the black coral colony maximum stem diameter in cm), Depth (the depth the colony was recorded at in m), Genus (the colony genus name), Species (the colony species name). [file peerj-06-5129-s006.csv]

Year	Survey.Year_Month	Site	Transect	Transect.Area.m2	Height.cm	Width.cm	Diameter.cm	Depth.m	Genus	Species
1998	1999_5	Caleta	1	1455	15	16	0.29	56.388	Antipathes	atlantica
1998	1999_5	Caleta	1	1455	23	43	0.55	54.864	Antipathes	atlantica
1998	1999_5	Caleta	1	1455	33	39	0.457	57.3024	Antipathes	atlantica
1998	1999_5	Caleta	1	1455	34	27	0.41	55.7784	Antipathes	atlantica
1998	1999_5	Caleta	1	1455	47	39	0.02	51.816	Antipathes	caribbeana
1998	1999_5	Caleta	1	1455	24	29	0.22	54.864	Cupressopathes	gracilis
1998	1999_5	Caleta	1	1455	38	23	0.41	51.816	Plumapathes	pennacea
1998	1999_5	Caleta	1	1455	42	39	0.762	48.1584	Plumapathes	pennacea
1998	1999_5	Caleta	1	1455	42	33	0.6	57.912	Plumapathes	pennacea
1998	1999_5	Caleta	1	1455	54	44	0.05	57.912	Plumapathes	pennacea
1998	1999_5	Caleta	1	1455	66	45	0.914	57.912	Plumapathes	pennacea
1998	1999_5	Caleta	1	1455	71	34	0.87	57.6072	Plumapathes	pennacea
1998	1999_5	Caleta	1	1455	72	45	0.47	54.864	Plumapathes	pennacea
1998	1999_5	Caleta	1	1455	79	78	1.118	53.34	Plumapathes	pennacea
1998	1999_5	Caleta	1	1455	81	42	0.62	57.912	Plumapathes	pennacea
1998	1999_5	Caleta	1	1455	83	86	1.9	54.864	Plumapathes	pennacea
1998	1999_5	Caleta	1	1455	84	62	0.76	54.864	Plumapathes	pennacea
1998	1999_5	Caleta	1	1455	90	60	0.889	57.912	Plumapathes	pennacea
1998	1999_5	Caleta	1	1455	91	55	1.524	56.388	Plumapathes	pennacea
1998	1999_5	Caleta	1	1455	91	54	0.82	54.864	Plumapathes	pennacea
1998	1999_5	Caleta	1	1455	96	84	1.1	57.912	Plumapathes	pennacea
1998	1999_5	Caleta	1	1455	101	76	1	54.864	Plumapathes	pennacea
1998	1999_5	Caleta	1	1455	108	72	1.2	51.816	Plumapathes	pennacea
1998	1999_5	Caleta	1	1455	109	106	1.9	57.912	Plumapathes	pennacea
1998	1999_5	Caleta	1	1455	19	34	0.02	54.864	Tanacetipathes	tanacetum
1998	1998_6	Colombia N	1	1180	56	27	0.457	18.288	Plumapathes	pennacea
1998	1998_6	Colombia N	1	1180	94	79	1.092	41.148	Plumapathes	pennacea
1998	1998_6	Colombia N	1	1180	97	107	1.372	30.48	Plumapathes	pennacea
1998	1998_6	Colombia N	1	1180	119	108	1.8	33.528	Plumapathes	pennacea
1998	1998_6	Colombia N	1	1180	122	112	1.7	35.9664	Plumapathes	pennacea
1998	1998_6	Colombia N	1	1180	132	97	1.168	42.0624	Plumapathes	pennacea
1998	1998_6	Colombia N	1	1180	141	77	1.321	39.624	Plumapathes	pennacea
1998	1998_6	Colombia N	1	1180	147	72	2.261	41.4528	Plumapathes	pennacea
1998	1998_6	Colombia N	1	1180	148	200	1.702	30.48	Plumapathes	pennacea
1998	1999_9	Chancanab	1	525	22	16	0.3	47.27448	Antipathes	atlantica
1998	1999_9	Chancanab	1	525	27	29	0.12	52.1208	Antipathes	atlantica
1998	1999_9	Chancanab	1	525	34	24	0.2	47.27448	Antipathes	atlantica
1998	1999_9	Chancanab	1	525	57	47	0.4	51.80076	Antipathes	caribbeana
1998	1999_9	Chancanab	1	525	16.5	25	0.42	52.7304	Cupressopathes	gracilis
1998	1999_9	Chancanab	1	525	17	28	0.1	55.3212	Cupressopathes	gracilis
1998	1999_9	Chancanab	1	525	18	25	0.1	46.26864	Cupressopathes	gracilis
1998	1999_9	Chancanab	1	525	19	16	0.2	48.28032	Cupressopathes	gracilis
1998	1999_9	Chancanab	1	525	20	25	0.3	47.27448	Cupressopathes	gracilis
1998	1999_9	Chancanab	1	525	24	21	0.11	52.1208	Cupressopathes	gracilis
1998	1999_9	Chancanab	1	525	26	14	0.32	52.7304	Cupressopathes	gracilis
1998	1999_9	Chancanab	1	525	32	21	0.42	56.0832	Cupressopathes	gracilis
1998	1999_9	Chancanab	1	525	20	15	0.1	47.27448	Plumapathes	pennacea
1998	1999_9	Chancanab	1	525	23	14	0.1	47.27448	Plumapathes	pennacea
1998	1999_9	Chancanab	1	525	30	14	0.29	53.0352	Plumapathes	pennacea
1998	1999_9	Chancanab	1	525	41	32	0.36	52.1208	Plumapathes	pennacea
1998	1999_9	Chancanab	1	525	51	37	0.6	52.30368	Plumapathes	pennacea
1998	1999_9	Chancanab	1	525	52	60	0.6	46.26864	Plumapathes	pennacea
1998	1999_9	Chancanab	1	525	54	16	0.22	53.0352	Plumapathes	pennacea
1998	1999_9	Chancanab	1	525	56	29	0.46	44.196	Plumapathes	pennacea
1998	1999_9	Chancanab	1	525	56	28	0.6	48.28032	Plumapathes	pennacea
1998	1999_9	Chancanab	1	525	72	52	0.89	53.34	Plumapathes	pennacea
1998	1999_9	Chancanab	1	525	74	39	0.4	46.26864	Plumapathes	pennacea
1998	1999_9	Chancanab	1	525	75	84	1.3	48.28032	Plumapathes	pennacea
1998	1999_9	Chancanab	1	525	76	77	0.9	46.369224	Plumapathes	pennacea
1998	1999_9	Chancanab	1	525	83.5	46	0.58	57.6072	Plumapathes	pennacea
1998	1999_9	Chancanab	1	525	84	60	1.1	54.31536	Plumapathes	pennacea
1998	1999_9	Chancanab	1	525	89	70	1.2	47.27448	Plumapathes	pennacea
1998	1999_9	Chancanab	1	525	89	69	0.79	47.244	Plumapathes	pennacea
1998	1999_9	Chancanab	1	525	92	54	0.99	46.9392	Plumapathes	pennacea
1998	1999_9	Chancanab	1	525	99	63	0.73	47.8536	Plumapathes	pennacea
1998	1999_9	Chancanab	1	525	106	57	1.09	46.9392	Plumapathes	pennacea
1998	1999_9	Chancanab	1	525	114	60	0.95	52.1208	Plumapathes	pennacea
1998	1999_9	Chancanab	1	525	138	125	1.46	61.8744	Plumapathes	pennacea
1998	1998_6	Colombia 2	1	128.25	21	27	NA	59.1312	Antipathes	atlantica
1998	1998_6	Colombia 2	1	128.25	23	30	NA	62.7888	Antipathes	atlantica
1998	1998_6	Colombia 2	1	128.25	40	21	NA	60.6552	Antipathes	atlantica
1998	1998_6	Colombia 2	1	128.25	73	83	NA	64.9224	Antipathes	caribbeana
1998	1998_6	Colombia 2	1	128.25	38	52	NA	64.008	Plumapathes	pennacea
1998	1998_6	Colombia 2	1	128.25	50	45	NA	60.0456	Plumapathes	pennacea
1998	1998_6	Colombia 2	1	128.25	51	60	NA	64.008	Plumapathes	pennacea
1998	1998_6	Colombia 2	1	128.25	67	40	NA	63.7032	Plumapathes	pennacea
1998	1998_6	Colombia 2	1	128.25	68	65	NA	64.008	Plumapathes	pennacea
1998	1998_6	Colombia 2	1	128.25	75	63	NA	64.008	Plumapathes	pennacea
1998	1998_6	Colombia 2	1	128.25	75	54	NA	64.008	Plumapathes	pennacea
1998	1998_6	Colombia 2	1	128.25	76	71	NA	64.9224	Plumapathes	pennacea
1998	1998_6	Colombia 2	1	128.25	77	137	NA	62.484	Plumapathes	pennacea
1998	1998_6	Colombia 2	1	128.25	85	71	NA	63.7032	Plumapathes	pennacea
1998	1998_6	Colombia 2	1	128.25	47	16	NA	64.008	Tanacetipathes	tanacetum
1998	1998_6	Colombia 1	1	757.5	20	19	0.355	57.6072	Antipathes	atlantica
1998	1998_6	Colombia 1	1	757.5	21	18	0.279	63.3984	Antipathes	atlantica
1998	1998_6	Colombia 1	1	757.5	27	28	0.482	62.7888	Antipathes	atlantica
1998	1998_6	Colombia 1	1	757.5	29	23	0.457	60.6552	Antipathes	atlantica
1998	1998_6	Colombia 1	1	757.5	32	28	0.33	60.96	Antipathes	atlantica
1998	1998_6	Colombia 1	1	757.5	35	35	0.533	60.6552	Antipathes	atlantica
1998	1998_6	Colombia 1	1	757.5	35	31	0.355	57.6072	Antipathes	atlantica
1998	1998_6	Colombia 1	1	757.5	40	35	0.533	60.96	Antipathes	atlantica
1998	1998_6	Colombia 1	1	757.5	47	48	0.457	61.5696	Antipathes	atlantica
1998	1998_6	Colombia 1	1	757.5	49	47	0.685	63.0936	Antipathes	atlantica
1998	1998_6	Colombia 1	1	757.5	49	42	0.533	60.96	Antipathes	atlantica
1998	1998_6	Colombia 1	1	757.5	43	38	0.711	62.484	Antipathes	caribbeana
1998	1998_6	Colombia 1	1	757.5	89	70	1.066	63.3984	Antipathes	caribbeana
1998	1998_6	Colombia 1	1	757.5	38	35	0.254	64.008	Cupressopathes	gracilis
1998	1998_6	Colombia 1	1	757.5	23	16	0.33	62.484	Plumapathes	pennacea
1998	1998_6	Colombia 1	1	757.5	53	38	0.863	51.816	Plumapathes	pennacea
1998	1998_6	Colombia 1	1	757.5	61	61	0.812	56.6928	Plumapathes	pennacea
1998	1998_6	Colombia 1	1	757.5	73	54	1.168	59.436	Plumapathes	pennacea
1998	1998_6	Colombia 1	1	757.5	77	65	0.889	63.3984	Plumapathes	pennacea
1998	1998_6	Colombia 1	1	757.5	81	62	0.762	55.4736	Plumapathes	pennacea
1998	1998_6	Colombia 1	1	757.5	87	67	0.787	57.912	Plumapathes	pennacea
1998	1998_6	Colombia 1	1	757.5	46	28	0.381	60.3504	Tanacetipathes	tanacetum
1998	1998_6	Estacion de Monitoreo	1	625	42	68	0.381	28.956	Antipathes	atlantica
1998	1998_6	Estacion de Monitoreo	1	625	50	35	0.533	31.0896	Antipathes	atlantica
1998	1998_6	Estacion de Monitoreo	1	625	57	47	0.889	38.4048	Antipathes	atlantica
1998	1998_6	Estacion de Monitoreo	1	625	44	46	0.876	38.4048	Antipathes	caribbeana
1998	1998_6	Estacion de Monitoreo	1	625	62	45	0.66	37.7952	Antipathes	caribbeana
1998	1998_6	Estacion de Monitoreo	1	625	66	88	0.485	29.8704	Antipathes	lenta
1998	1998_6	Estacion de Monitoreo	1	625	31	24	0.228	39.0144	Cupressopathes	gracilis
1998	1998_6	Estacion de Monitoreo	1	625	72	85	1.042	24.9936	Cupressopathes	gracilis
1998	1998_6	Estacion de Monitoreo	1	625	29	16	0.254	38.4048	Plumapathes	pennacea
1998	1998_6	Estacion de Monitoreo	1	625	48	54	0.635	33.528	Plumapathes	pennacea
1998	1998_6	Estacion de Monitoreo	1	625	58	54	0.457	28.6512	Plumapathes	pennacea
1998	1998_6	Estacion de Monitoreo	1	625	65	65	1.473	30.48	Plumapathes	pennacea
1998	1998_6	Estacion de Monitoreo	1	625	66	36	0.609	33.528	Plumapathes	pennacea
1998	1998_6	Estacion de Monitoreo	1	625	77	68	0.99	38.4048	Plumapathes	pennacea
1998	1998_6	Estacion de Monitoreo	1	625	77	68	1.27	36.576	Plumapathes	pennacea
1998	1998_6	Estacion de Monitoreo	1	625	80	76	0.965	28.956	Plumapathes	pennacea
1998	1998_6	Estacion de Monitoreo	1	625	81	97	0.787	27.432	Plumapathes	pennacea
1998	1998_6	Estacion de Monitoreo	1	625	81	61	1.168	32.9184	Plumapathes	pennacea
1998	1998_6	Estacion de Monitoreo	1	625	81	52	0.787	38.4048	Plumapathes	pennacea
1998	1998_6	Estacion de Monitoreo	1	625	92	75	0.938	27.1272	Plumapathes	pennacea
1998	1998_6	Estacion de Monitoreo	1	625	92	75	0.965	27.432	Plumapathes	pennacea
1998	1998_6	Estacion de Monitoreo	1	625	92	50	0.863	36.576	Plumapathes	pennacea
1998	1998_6	Estacion de Monitoreo	1	625	93	68	1.27	28.956	Plumapathes	pennacea
1998	1998_6	Estacion de Monitoreo	1	625	94	68	0.711	28.6512	Plumapathes	pennacea
1998	1998_6	Estacion de Monitoreo	1	625	98	55	0.838	34.1376	Plumapathes	pennacea
1998	1998_6	Estacion de Monitoreo	1	625	103	70	1.346	36.576	Plumapathes	pennacea
1998	1998_6	Estacion de Monitoreo	1	625	103	64	1.27	36.576	Plumapathes	pennacea
1998	1998_6	Estacion de Monitoreo	1	625	104	136	1.397	36.576	Plumapathes	pennacea
1998	1998_6	Estacion de Monitoreo	1	625	107	119	1.495	30.48	Plumapathes	pennacea
1998	1998_6	Estacion de Monitoreo	1	625	113	46	1.168	25.908	Plumapathes	pennacea
1998	1998_6	Estacion de Monitoreo	1	625	118	100	1.371	31.0896	Plumapathes	pennacea
1998	1998_6	Estacion de Monitoreo	1	625	126	80	1.676	28.6512	Plumapathes	pennacea
1998	1998_6	Estacion de Monitoreo	1	625	130	134	1.854	30.48	Plumapathes	pennacea
1998	1998_6	Estacion de Monitoreo	1	625	71	NA	0.177	27.432	Stichopathes	NA
1998	1998_6	Estacion de Monitoreo	1	625	89	NA	0.482	38.4048	Stichopathes	NA
1998	1998_6	El Cedral	1	378.5	15	8	0.203	75.5904	Antipathes	atlantica
1998	1998_6	El Cedral	1	378.5	24	21	0.304	76.2	Antipathes	atlantica
1998	1998_6	El Cedral	1	378.5	25	19	0.279	77.1144	Antipathes	atlantica
1998	1998_6	El Cedral	1	378.5	26	20	0.381	75.8952	Antipathes	atlantica
1998	1998_6	El Cedral	1	378.5	26	14	0.254	75.8952	Antipathes	atlantica
1998	1998_6	El Cedral	1	378.5	28	24	0.406	75.8952	Antipathes	atlantica
1998	1998_6	El Cedral	1	378.5	33	43	0.457	76.8096	Antipathes	atlantica
1998	1998_6	El Cedral	1	378.5	77	69	1.016	76.2	Antipathes	caribbeana
1998	1998_6	El Cedral	1	378.5	57	33	0.482	NA	NA	NA
1998	1998_6	El Cedral	1	378.5	22	29	0.406	76.5048	Plumapathes	pennacea
1998	1998_6	El Cedral	1	378.5	34	21	0.457	76.2	Plumapathes	pennacea
1998	1998_6	El Cedral	1	378.5	39	36	0.508	75.5904	Plumapathes	pennacea
1998	1998_6	El Cedral	1	378.5	40	33	0.335	77.1144	Plumapathes	pennacea
1998	1998_6	El Cedral	1	378.5	40	32	0.355	76.8096	Plumapathes	pennacea
1998	1998_6	El Cedral	1	378.5	47	40	0.355	73.7616	Plumapathes	pennacea
1998	1998_6	El Cedral	1	378.5	47	25	0.965	74.9808	Plumapathes	pennacea
1998	1998_6	El Cedral	1	378.5	50	42	0.711	72.8472	Plumapathes	pennacea
1998	1998_6	El Cedral	1	378.5	52	36	0.812	77.1144	Plumapathes	pennacea
1998	1998_6	El Cedral	1	378.5	62	54	0.457	76.5048	Plumapathes	pennacea
1998	1998_6	El Cedral	1	378.5	65	37	0.584	74.676	Plumapathes	pennacea
1998	1998_6	El Cedral	1	378.5	66	56	0.635	73.7616	Plumapathes	pennacea
1998	1998_6	El Cedral	1	378.5	85	50	0.558	76.2	Plumapathes	pennacea
1998	1998_6	El Cedral	1	378.5	94	95	0.813	75.5904	Plumapathes	pennacea
1998	1998_6	El Cedral	1	378.5	94	61	1.117	69.4944	Plumapathes	pennacea
1998	1998_6	El Cedral	1	378.5	95	40	0.863	77.1144	Plumapathes	pennacea
1998	1998_6	El Cedral	1	378.5	97	89	1.32	71.9328	Plumapathes	pennacea
1998	1998_6	El Cedral	1	378.5	30	6	0.203	74.9808	Tanacetipathes	tanacetum
1998	1998_6	El Cedral	1	378.5	34	12	0.406	76.5048	Tanacetipathes	tanacetum
1998	1998_6	Las Palmas	1	1196.5	14	27	0.177	64.3128	Antipathes	atlantica
1998	1998_6	Las Palmas	1	1196.5	23	24	0.304	63.7032	Antipathes	atlantica
1998	1998_6	Las Palmas	1	1196.5	33	42	0.584	64.3128	Antipathes	atlantica
1998	1998_6	Las Palmas	1	1196.5	40	37	0.304	64.6176	Antipathes	atlantica
1998	1998_6	Las Palmas	1	1196.5	42	59	0.432	64.008	Antipathes	atlantica
1998	1998_6	Las Palmas	1	1196.5	40	42	0.355	65.2272	Antipathes	caribbeana
1998	1998_6	Las Palmas	1	1196.5	47	37	0.254	64.9224	Antipathes	caribbeana
1998	1998_6	Las Palmas	1	1196.5	56	55	0.558	64.6176	Antipathes	caribbeana
1998	1998_6	Las Palmas	1	1196.5	41	47	0.533	65.2272	Antipathes	plana
1998	1998_6	Las Palmas	1	1196.5	21	25	0.254	NA	NA	NA
1998	1998_6	Las Palmas	1	1196.5	45	32	1.041	65.532	Plumapathes	pennacea
1998	1998_6	Las Palmas	1	1196.5	57	32	0.711	63.7032	Plumapathes	pennacea
1998	1998_6	Las Palmas	1	1196.5	64	47	0.99	62.7888	Plumapathes	pennacea
1998	1998_6	Las Palmas	1	1196.5	71	41	0.482	62.1792	Plumapathes	pennacea
1998	1998_6	Las Palmas	1	1196.5	75	125	1.27	65.532	Plumapathes	pennacea
1998	1998_6	Las Palmas	1	1196.5	76	35	0.99	60.6552	Plumapathes	pennacea
1998	1998_6	Las Palmas	1	1196.5	79	75	1.066	64.6176	Plumapathes	pennacea
1998	1998_6	Las Palmas	1	1196.5	79	58	0.863	62.7888	Plumapathes	pennacea
1998	1998_6	Las Palmas	1	1196.5	80	20	0.711	60.96	Plumapathes	pennacea
1998	1998_6	Las Palmas	1	1196.5	82	39	1.041	63.7032	Plumapathes	pennacea
1998	1998_6	Las Palmas	1	1196.5	91	113	1.524	64.9224	Plumapathes	pennacea
1998	1998_6	Las Palmas	1	1196.5	91	56	1.117	64.3128	Plumapathes	pennacea
1998	1998_6	Las Palmas	1	1196.5	102	49	1.295	61.5696	Plumapathes	pennacea
1998	1998_6	Las Palmas	1	1196.5	123	120	1.778	63.3984	Plumapathes	pennacea
1998	1998_6	Las Palmas	1	1196.5	127	86	1.371	60.6552	Plumapathes	pennacea
1998	1998_6	Las Palmas	1	1196.5	NA	NA	1.473	41.4528	Plumapathes	pennacea
1998	1998_6	Las Palmas	1	1196.5	33	27	0.355	61.8744	Tanacetipathes	tanacetum
1998	1999_9	Maracaibo	1	246	37	40	0.2	63.267336	Antipathes	atlantica
1998	1999_9	Maracaibo	1	246	49	13	0.2	61.85916	Antipathes	atlantica
1998	1999_9	Maracaibo	1	246	70	54	0.29	64.008	Antipathes	atlantica
1998	1999_9	Maracaibo	1	246	16	20	0.29	63.3984	Antipathes	caribbeana
1998	1999_9	Maracaibo	1	246	18	19.5	0.26	63.3984	Antipathes	caribbeana
1998	1999_9	Maracaibo	1	246	20	24	0.39	63.3984	Antipathes	caribbeana
1998	1999_9	Maracaibo	1	246	23.5	28.5	0.31	63.7032	Antipathes	caribbeana
1998	1999_9	Maracaibo	1	246	28	29	0.3	62.462664	Antipathes	caribbeana
1998	1999_9	Maracaibo	1	246	43	40	0.49	62.7888	Antipathes	caribbeana
1998	1999_9	Maracaibo	1	246	60	34	1.4	62.160912	Antipathes	caribbeana
1998	1999_9	Maracaibo	1	246	49	27	0.57	60.6552	Plumapathes	pennacea
1998	1999_9	Maracaibo	1	246	51	60	0.53	65.8368	Plumapathes	pennacea
1998	1999_9	Maracaibo	1	246	58	46	0.6	61.85916	Plumapathes	pennacea
1998	1999_9	Maracaibo	1	246	74	70	1.5	62.160912	Plumapathes	pennacea
1998	1999_9	Maracaibo	1	246	80	62	1.6	57.634632	Plumapathes	pennacea
1998	1999_9	Maracaibo	1	246	89	77	1.03	60.6552	Plumapathes	pennacea
1998	1999_9	Maracaibo	1	246	92	47	1.2	62.160912	Plumapathes	pennacea
1998	1999_9	Maracaibo	1	246	97	78	1.1	61.959744	Plumapathes	pennacea
1998	1999_9	Maracaibo	1	246	115	88	1.18	59.7408	Plumapathes	pennacea
1998	1998_6	Paraiso	1	469.5	10	16	0.254	60.3504	Antipathes	atlantica
1998	1998_6	Paraiso	1	469.5	15.5	14	0.355	57.912	Antipathes	atlantica
1998	1998_6	Paraiso	1	469.5	24	30	0.508	54.864	Antipathes	atlantica
1998	1998_6	Paraiso	1	469.5	35	22	0.406	59.1312	Antipathes	atlantica
1998	1998_6	Paraiso	1	469.5	39	32	0.533	56.388	Antipathes	atlantica
1998	1998_6	Paraiso	1	469.5	55	51	0.762	58.8264	Antipathes	atlantica
1998	1998_6	Paraiso	1	469.5	72	60	0.812	56.388	Antipathes	caribbeana
1998	1998_6	Paraiso	1	469.5	50	42	0.508	61.5696	Plumapathes	pennacea
1998	1998_6	Paraiso	1	469.5	62	61	0.584	56.9976	Plumapathes	pennacea
1998	1998_6	Paraiso	1	469.5	64	61	0.533	57.912	Plumapathes	pennacea
1998	1998_6	Paraiso	1	469.5	64	53	0.711	61.5696	Plumapathes	pennacea
1998	1998_6	Paraiso	1	469.5	80	72	1.143	56.388	Plumapathes	pennacea
1998	1998_6	Paraiso	1	469.5	85	72	1.219	54.864	Plumapathes	pennacea
1998	1998_6	Paraiso	1	469.5	90	74	0.838	61.5696	Plumapathes	pennacea
1998	1998_6	Paraiso	1	469.5	96	76	2.48	57.912	Plumapathes	pennacea
1998	1998_6	Paraiso	1	469.5	101	66	0.838	58.8264	Plumapathes	pennacea
1998	1998_6	Paraiso	1	469.5	106	86	1.066	64.3128	Plumapathes	pennacea
1998	1998_6	Paso del Cedral	1	166.5	21	26	0.533	57.912	Antipathes	atlantica
1998	1998_6	Paso del Cedral	1	166.5	21	11	0.076	60.6552	Antipathes	atlantica
1998	1998_6	Paso del Cedral	1	166.5	34	16	0.635	57.912	Antipathes	atlantica
1998	1998_6	Paso del Cedral	1	166.5	54	73	0.812	59.436	Antipathes	caribbeana
1998	1998_6	Paso del Cedral	1	166.5	43	39	0.635	57.912	Plumapathes	pennacea
1998	1998_6	Paso del Cedral	1	166.5	44	34	0.381	58.5216	Plumapathes	pennacea
1998	1998_6	Paso del Cedral	1	166.5	50	56	0.66	59.436	Plumapathes	pennacea
1998	1998_6	Paso del Cedral	1	166.5	50	40	0.66	59.436	Plumapathes	pennacea
1998	1998_6	Paso del Cedral	1	166.5	50	36	0.762	59.436	Plumapathes	pennacea
1998	1998_6	Paso del Cedral	1	166.5	53	83	1.219	57.912	Plumapathes	pennacea
1998	1998_6	Paso del Cedral	1	166.5	58	31	1.422	59.436	Plumapathes	pennacea
1998	1998_6	Paso del Cedral	1	166.5	60	81	0.584	57.3024	Plumapathes	pennacea
1998	1998_6	Paso del Cedral	1	166.5	64	85	0.99	60.6552	Plumapathes	pennacea
1998	1998_6	Paso del Cedral	1	166.5	64	75	0.914	59.7408	Plumapathes	pennacea
1998	1998_6	Paso del Cedral	1	166.5	68	99	1.193	57.912	Plumapathes	pennacea
1998	1998_6	Paso del Cedral	1	166.5	69	79	1.092	59.7408	Plumapathes	pennacea
1998	1998_6	Paso del Cedral	1	166.5	81	79	1.168	59.436	Plumapathes	pennacea
1998	1998_6	Paso del Cedral	1	166.5	81	52	0.762	57.912	Plumapathes	pennacea
1998	1998_6	Paso del Cedral	1	166.5	90	107	1.524	57.912	Plumapathes	pennacea
1998	1998_6	Paso del Cedral	1	166.5	94	59	0.762	58.8264	Plumapathes	pennacea
1998	1999_5	Palancar Jardines	1	604	12	25	0.2	51.816	Antipathes	atlantica
1998	1999_5	Palancar Jardines	1	604	12	9	0.1	51.816	Antipathes	atlantica
1998	1999_5	Palancar Jardines	1	604	34	57	0.3	51.816	Antipathes	atlantica
1998	1999_5	Palancar Jardines	1	604	35	18	0.3	39.624	Antipathes	atlantica
1998	1999_5	Palancar Jardines	1	604	37	46	0.24	51.816	Antipathes	atlantica
1998	1999_5	Palancar Jardines	1	604	54	66	0.5	54.864	Antipathes	atlantica
1998	1999_5	Palancar Jardines	1	604	64	80	0.3	54.864	Antipathes	atlantica
1998	1999_5	Palancar Jardines	1	604	78	102	0.32	51.816	Antipathes	atlantica
1998	1999_5	Palancar Jardines	1	604	49	47	0.41	51.816	Antipathes	caribbeana
1998	1999_5	Palancar Jardines	1	604	51	49	0.4	54.864	Antipathes	caribbeana
1998	1999_5	Palancar Jardines	1	604	87	77	1.12	51.816	Antipathes	caribbeana
1998	1999_5	Palancar Jardines	1	604	97	104	0.6	54.864	Antipathes	caribbeana
1998	1999_5	Palancar Jardines	1	604	64	72	0.52	54.864	Plumapathes	pennacea
1998	1999_5	Palancar Jardines	1	604	65	62	0.62	51.816	Plumapathes	pennacea
1998	1999_5	Palancar Jardines	1	604	70	100	1.1	51.816	Plumapathes	pennacea
1998	1999_5	Palancar Jardines	1	604	70	91	1.6	39.624	Plumapathes	pennacea
1998	1999_5	Palancar Jardines	1	604	74	78	1.1	53.34	Plumapathes	pennacea
1998	1999_5	Palancar Jardines	1	604	80	52	1.5	39.624	Plumapathes	pennacea
1998	1999_5	Palancar Jardines	1	604	81	104	1	54.864	Plumapathes	pennacea
1998	1999_5	Palancar Jardines	1	604	83	68	0.72	51.816	Plumapathes	pennacea
1998	1999_5	Palancar Jardines	1	604	89	95	0.78	51.816	Plumapathes	pennacea
1998	1999_5	Palancar Jardines	1	604	92	85	1	42.672	Plumapathes	pennacea
1998	1999_5	Palancar Jardines	1	604	93	42	0.65	51.816	Plumapathes	pennacea
1998	1999_5	Palancar Jardines	1	604	100	170	1.4	58.5216	Plumapathes	pennacea
1998	1999_5	Palancar Jardines	1	604	115	87	1.05	54.864	Plumapathes	pennacea
1998	1999_9	Punta Sur	1	168	30	35	0.2	59.436	Antipathes	atlantica
1998	1999_9	Punta Sur	1	168	60	77	0.5	62.484	Antipathes	caribbeana
1998	1999_9	Punta Sur	1	168	60	50	0.4	62.484	Antipathes	caribbeana
1998	1999_9	Punta Sur	1	168	100	70	1	62.484	Antipathes	caribbeana
1998	1999_9	Punta Sur	1	168	25	30	0.2	58.8264	Cupressopathes	gracilis
1998	1999_9	Punta Sur	1	168	30	25	0.2	62.7888	Cupressopathes	gracilis
1998	1999_9	Punta Sur	1	168	35	40	0.5	62.7888	Plumapathes	pennacea
1998	1999_9	Punta Sur	1	168	41	53	0.6	62.484	Plumapathes	pennacea
1998	1999_9	Punta Sur	1	168	41	40	0.6	62.484	Plumapathes	pennacea
1998	1999_9	Punta Sur	1	168	52	48	0.2	58.5216	Plumapathes	pennacea
1998	1999_9	Punta Sur	1	168	70	82	1	58.8264	Plumapathes	pennacea
1998	1999_9	Punta Sur	1	168	80	90	1.3	62.484	Plumapathes	pennacea
1998	1999_9	Punta Sur	1	168	60	NA	0.1	62.484	Stichopathes	NA
1998	1999_9	Punta Sur	1	168	100	NA	0.1	62.484	Stichopathes	NA
1998	1999_9	Santa Rosa	1	264	13	40	0.1	63.7032	Antipathes	atlantica
1998	1999_9	Santa Rosa	1	264	34	30	0.1	60.96	Antipathes	atlantica
1998	1999_9	Santa Rosa	1	264	15	17	0.2	56.9976	Cupressopathes	gracilis
1998	1999_9	Santa Rosa	1	264	12	80	0.9	18.288	Plumapathes	pennacea
1998	1999_9	Santa Rosa	1	264	14	70	0.8	60.6552	Plumapathes	pennacea
1998	1999_9	Santa Rosa	1	264	46	50	0.6	63.7032	Plumapathes	pennacea
1998	1999_9	Santa Rosa	1	264	62	87	1	61.8744	Plumapathes	pennacea
1998	1999_9	Santa Rosa	1	264	67	135	1.2	60.3504	Plumapathes	pennacea
1998	1999_9	Santa Rosa	1	264	67	68	0.9	58.2168	Plumapathes	pennacea
1998	1999_9	Santa Rosa	1	264	68	70	2	60.96	Plumapathes	pennacea
1998	1999_9	Santa Rosa	1	264	69	67	0.8	56.9976	Plumapathes	pennacea
1998	1999_9	Santa Rosa	1	264	70	110	0.3	60.0456	Plumapathes	pennacea
1998	1999_9	Santa Rosa	1	264	70	82	0.5	63.7032	Plumapathes	pennacea
1998	1999_9	Santa Rosa	1	264	75	55	0.5	60.6552	Plumapathes	pennacea
1998	1999_9	Santa Rosa	1	264	77	120	1.4	59.436	Plumapathes	pennacea
1998	1999_9	Santa Rosa	1	264	80	110	1.3	60.3504	Plumapathes	pennacea
1998	1999_9	Santa Rosa	1	264	80	95	0.5	58.2168	Plumapathes	pennacea
1998	1999_9	Santa Rosa	1	264	91	70	1	60.96	Plumapathes	pennacea
1998	1999_9	Santa Rosa	1	264	112	14	0.9	58.5216	Plumapathes	pennacea
1998	1999_9	Santa Rosa	1	264	114	52	0.8	63.0936	Plumapathes	pennacea
1998	1999_9	Santa Rosa	1	264	10	NA	0.2	60.6552	Stichopathes	NA
1998	1999_5	Tormentos	1	455	22	27	0.254	48.768	Antipathes	atlantica
1998	1999_5	Tormentos	1	455	34	43	0.305	47.244	Antipathes	atlantica
1998	1999_5	Tormentos	1	455	35	35	2.032	47.244	Antipathes	atlantica
1998	1999_5	Tormentos	1	455	36	25	0.305	48.768	Antipathes	atlantica
1998	1999_5	Tormentos	1	455	37	52	0.8	42.672	Antipathes	atlantica
1998	1999_5	Tormentos	1	455	50	62	0.254	47.244	Antipathes	atlantica
1998	1999_5	Tormentos	1	455	40	54	0.5	45.1104	Antipathes	caribbeana
1998	1999_5	Tormentos	1	455	52	12	0.381	47.244	Antipathes	caribbeana
1998	1999_5	Tormentos	1	455	60	98	0.9	42.672	Antipathes	caribbeana
1998	1999_5	Tormentos	1	455	62	41	0.381	47.244	Antipathes	caribbeana
1998	1999_5	Tormentos	1	455	68	95	1.5	42.672	Antipathes	caribbeana
1998	1999_5	Tormentos	1	455	78	80	0.8	42.672	Antipathes	caribbeana
1998	1999_5	Tormentos	1	455	82	90	1	45.1104	Antipathes	caribbeana
1998	1999_5	Tormentos	1	455	84	100	2	45.72	Antipathes	caribbeana
1998	1999_5	Tormentos	1	455	134	88	1.549	48.768	Antipathes	caribbeana
1998	1999_5	Tormentos	1	455	18	21	1.778	51.816	Plumapathes	pennacea
1998	1999_5	Tormentos	1	455	18	20	0.356	51.816	Plumapathes	pennacea
1998	1999_5	Tormentos	1	455	31	26	0.4	44.196	Plumapathes	pennacea
1998	1999_5	Tormentos	1	455	33	19	1.524	48.768	Plumapathes	pennacea
1998	1999_5	Tormentos	1	455	45	27	0.533	45.72	Plumapathes	pennacea
1998	1999_5	Tormentos	1	455	56	67	1.524	48.768	Plumapathes	pennacea
1998	1999_5	Tormentos	1	455	67	67	0.7	45.72	Plumapathes	pennacea
1998	1999_5	Tormentos	1	455	76	70	1.143	51.816	Plumapathes	pennacea
1998	1999_5	Tormentos	1	455	80	79	1	44.196	Plumapathes	pennacea
1998	1999_5	Tormentos	1	455	87	63	0.584	47.244	Plumapathes	pennacea
1998	1999_5	Tormentos	1	455	140	86	1.5	42.672	Plumapathes	pennacea
1998	1999_5	Yucab	1	1210	49	23	0.381	50.292	Antipathes	atlantica
1998	1999_5	Yucab	1	1210	42	28	0.33	52.30368	Antipathes	caribbeana
1998	1999_5	Yucab	1	1210	91	62	1.118	58.137552	Antipathes	caribbeana
1998	1999_5	Yucab	1	1210	43	45	0.29	57.912	Plumapathes	pennacea
1998	1999_5	Yucab	1	1210	47	40	0.27	57.912	Plumapathes	pennacea
1998	1999_5	Yucab	1	1210	49	61	0.35	54.864	Plumapathes	pennacea
1998	1999_5	Yucab	1	1210	58	73	0.711	53.30952	Plumapathes	pennacea
1998	1999_5	Yucab	1	1210	62	67	1.067	50.292	Plumapathes	pennacea
1998	1999_5	Yucab	1	1210	62	55	0.38	54.864	Plumapathes	pennacea
1998	1999_5	Yucab	1	1210	73	54	0.34	54.864	Plumapathes	pennacea
1998	1999_5	Yucab	1	1210	75	58	0.42	54.864	Plumapathes	pennacea
1998	1999_5	Yucab	1	1210	87	81	0.3	54.864	Plumapathes	pennacea
1998	1999_5	Yucab	1	1210	100	63	1.295	58.33872	Plumapathes	pennacea
1998	1999_5	Yucab	1	1210	101	82	1.524	53.510688	Plumapathes	pennacea
1998	1999_5	Yucab	1	1210	103	52	0.965	58.33872	Plumapathes	pennacea
2016	2016_8	CO	1	120	67.6	41.6	NA	55	Antipathes	caribbeana
2016	2016_8	CO	2	120	30.7	27.1	NA	55	Antipathes	caribbeana
2016	2016_8	CO	2	120	64	78.9	NA	55	Antipathes	caribbeana
2016	2016_8	CO	3	120	103.6	108.8	NA	55	Antipathes	caribbeana
2016	2016_8	HE	1	120	70.6	74.1	NA	55	Antipathes	caribbeana
2016	2016_8	HE	1	120	80.8	85.9	NA	55	Plumapathes	pennacea
2016	2016_8	HE	1	120	147	97	NA	55	Plumapathes	pennacea
2016	2016_8	HE	1	120	178.2	114.7	NA	55	Plumapathes	pennacea
2016	2016_8	HE	2	120	44.8	29	NA	55	Antipathes	caribbeana
2016	2016_8	HE	2	120	186.3	192.9	NA	55	Plumapathes	pennacea
2016	2016_8	HE	3	120	52.8	32.5	NA	55	Plumapathes	pennacea
2016	2016_8	HE	3	120	69.8	136.5	NA	55	Plumapathes	pennacea
2016	2016_8	HE	4	120	59.3	97.7	NA	55	Antipathes	caribbeana
2016	2016_8	HE	4	120	116.9	111.1	NA	55	Plumapathes	pennacea
2016	2016_8	HE	4	120	186.6	106.6	NA	55	Plumapathes	pennacea
2016	2016_8	PJ	1	120	37.6	53.6	NA	55	Antipathes	caribbeana
2016	2016_8	PJ	1	120	39.2	65.7	NA	55	Antipathes	caribbeana
2016	2016_8	PJ	1	120	67.8	103.4	NA	55	Plumapathes	pennacea
2016	2016_8	PJ	1	120	82.9	127.6	NA	55	Plumapathes	pennacea
2016	2016_8	PJ	1	120	84.3	70.2	NA	55	Plumapathes	pennacea
2016	2016_8	PJ	1	120	102.4	54.3	NA	55	Plumapathes	pennacea
2016	2016_8	PJ	1	120	105	117.1	NA	55	Plumapathes	pennacea
2016	2016_8	PJ	1	120	163.1	194.9	NA	55	Plumapathes	pennacea
2016	2016_8	PJ	1	120	194	108.1	NA	55	Plumapathes	pennacea
2016	2016_8	PJ	1	120	206.8	11.7	NA	55	Plumapathes	pennacea
2016	2016_8	PJ	2	120	90	108.7	NA	55	Antipathes	caribbeana
2016	2016_8	PJ	2	120	99.9	73.5	NA	55	Plumapathes	pennacea
2016	2016_8	PJ	2	120	143.9	124.2	NA	55	Plumapathes	pennacea
2016	2016_8	PJ	2	120	148.9	156.6	NA	55	Plumapathes	pennacea
2016	2016_8	PJ	3	120	86.8	87.6	NA	55	Plumapathes	pennacea
2016	2016_8	PJ	3	120	119.8	119.6	NA	55	Plumapathes	pennacea
2016	2016_8	PJ	3	120	124.5	87.4	NA	55	Plumapathes	pennacea
2016	2016_8	PJ	3	120	145.9	73.1	NA	55	Plumapathes	pennacea
2016	2016_8	PJ	3	120	148.1	210.4	NA	55	Plumapathes	pennacea
2016	2016_8	PJ	3	120	191.8	63.8	NA	55	Plumapathes	pennacea
2016	2016_8	PJ	3	120	199.1	72.9	NA	55	Plumapathes	pennacea
2016	2016_8	PJ	4	120	73.6	128.6	NA	55	Plumapathes	pennacea
2016	2016_8	PT	1	120	56.1	34.1	NA	55	Antipathes	caribbeana
2016	2016_8	PU	2	120	147.3	67	NA	55	Plumapathes	pennacea
2016	2016_8	SR	2	120	52.9	55.8	NA	55	Antipathes	caribbeana
2016	2016_8	SR	2	120	75.6	137.2	NA	55	Antipathes	caribbeana
2016	2016_8	SR	2	120	77	207.5	NA	55	Antipathes	caribbeana
2016	2016_8	VB	2	120	25	27.2	NA	55	Antipathes	caribbeana
1998		San Francisco	1	168	NA	NA	NA	NA	NA	NA
1998		San Francisco	1	168	NA	NA	NA	NA	NA	NA
1998		San Francisco	1	168	NA	NA	NA	NA	NA	NA
1998		San Francisco	1	168	NA	NA	NA	NA	NA	NA
1998		San Francisco	1	168	NA	NA	NA	NA	NA	NA
1998		San Francisco	1	168	NA	NA	NA	NA	NA	NA
1998		San Francisco	1	168	NA	NA	NA	NA	NA	NA
1998		San Francisco	1	168	NA	NA	NA	NA	NA	NA
1998		San Francisco	1	168	NA	NA	NA	NA	NA	NA
1998		San Francisco	1	168	NA	NA	NA	NA	NA	NA
1998		San Francisco	1	168	NA	NA	NA	NA	NA	NA
1998		San Francisco	1	168	NA	NA	NA	NA	NA	NA
1998		San Francisco	1	168	NA	NA	NA	NA	NA	NA
1998		San Francisco	1	168	NA	NA	NA	NA	NA	NA
1998		San Francisco	1	168	NA	NA	NA	NA	NA	NA
1998		San Francisco	1	168	NA	NA	NA	NA	NA	NA
1998		San Francisco	1	168	NA	NA	NA	NA	NA	NA
1998		San Francisco	1	168	NA	NA	NA	NA	NA	NA
1998		San Francisco	1	168	NA	NA	NA	NA	NA	NA
1998		San Francisco	1	168	NA	NA	NA	NA	NA	NA
1998		San Francisco	1	168	NA	NA	NA	NA	NA	NA
1998		San Francisco	1	168	NA	NA	NA	NA	NA	NA
1998		San Francisco	1	168	NA	NA	NA	NA	NA	NA
